# Supplementary material
Source: publisher figshare collection journal article supplement (https://tandf.figshare.com/ndownloader/files/17495498)
Supplement: Supplementary file 1 [file 17495498]

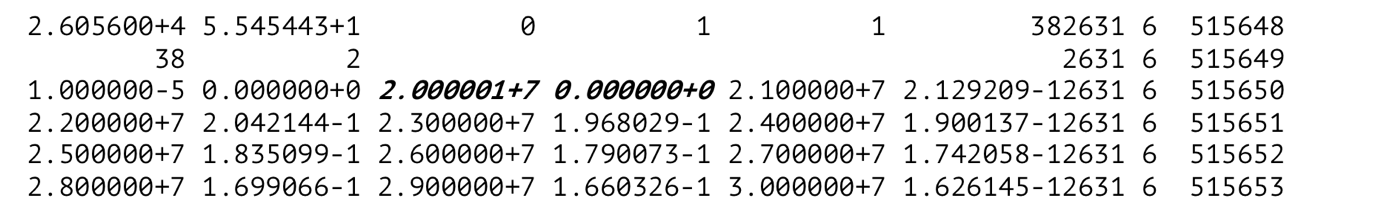


**Figure** A part of 56Fe production yield data in 56Fe of FENDL-3.1d (ENDF-6 format).

S. Kwon:

Study on DPA cross sections above 20 MeV in FENDL-3.1d for A-FNS neutronics analysis.


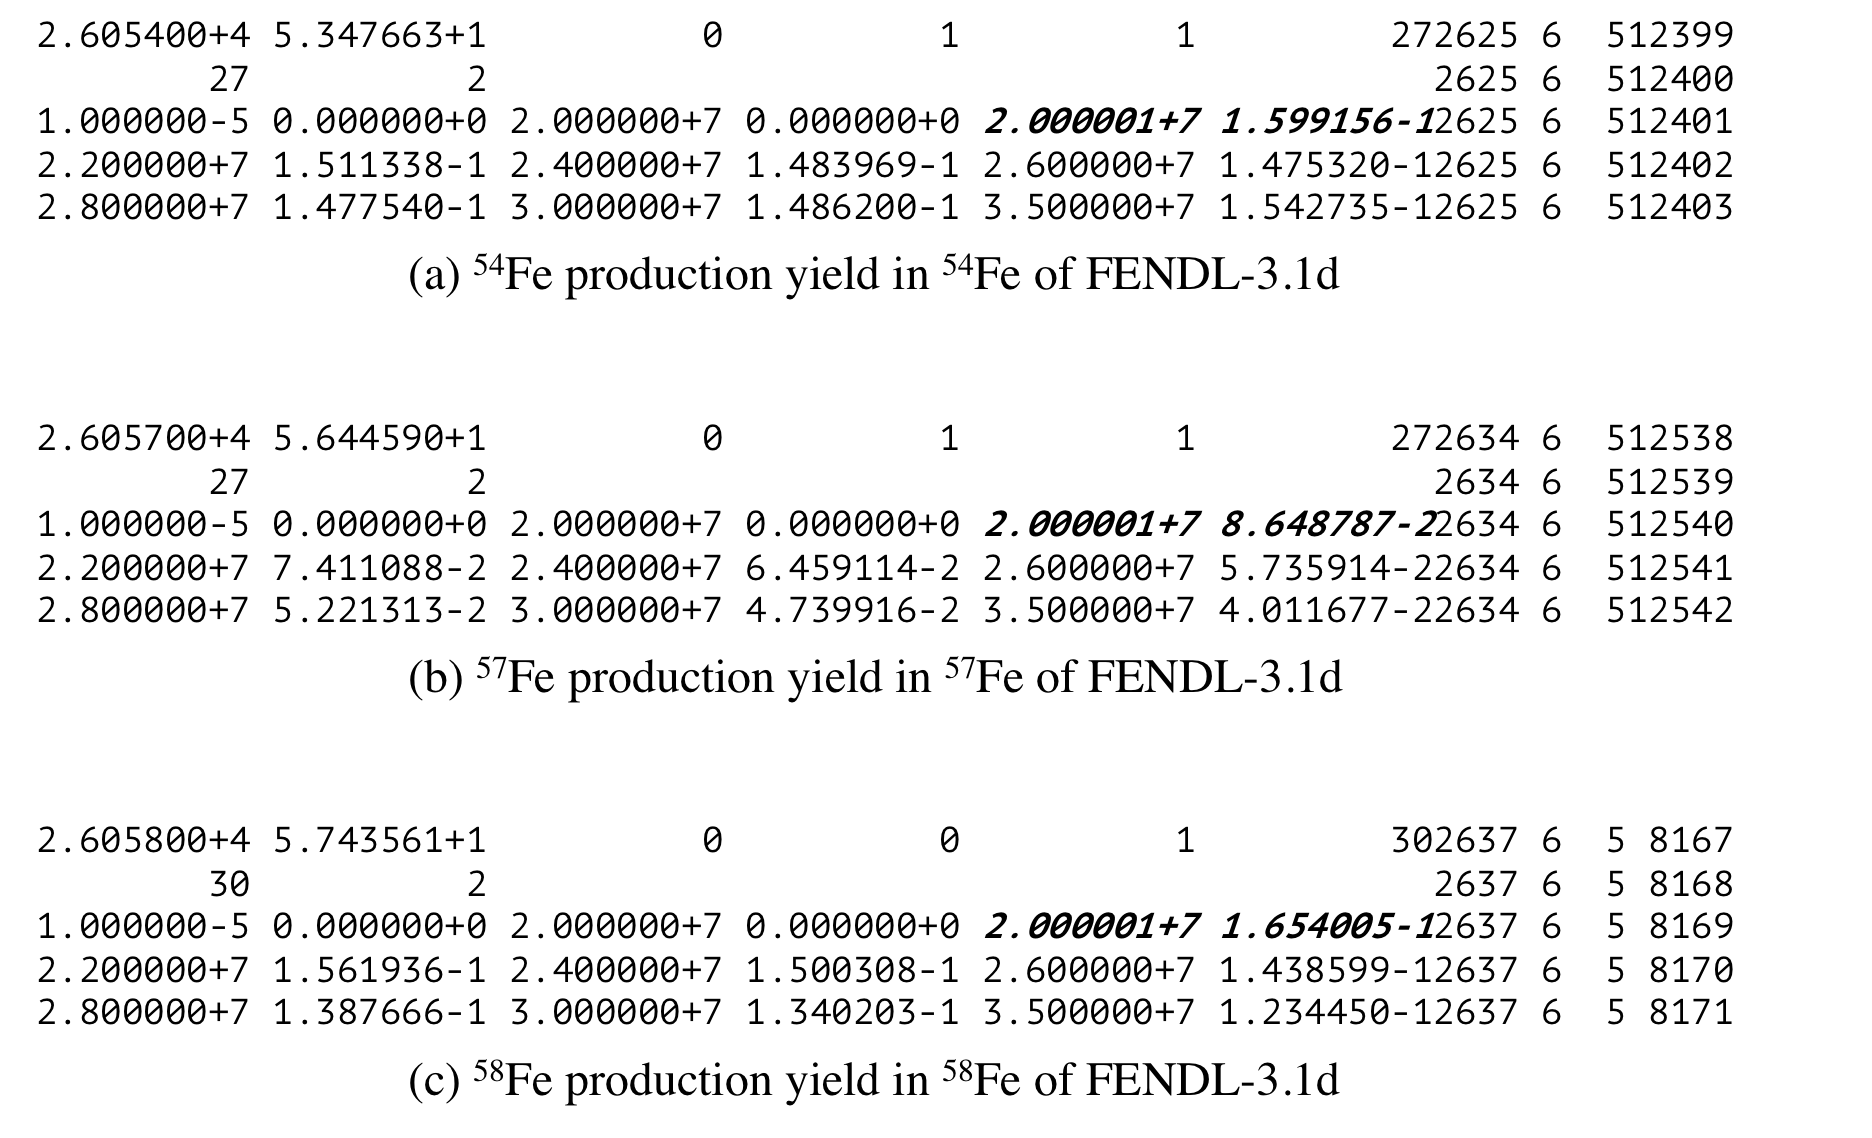


**Figure** A part of 54Fe, 57Fe, and 58Fe production yield data in 54Fe, 57Fe, and 58Fe of FENDL-3.1d (ENDF format), respectively.

S. Kwon:

Study on DPA cross sections above 20 MeV in FENDL-3.1d for A-FNS neutronics analysis.
